# Supplementary material
Source: ML conference proceedings conference paper supplement (https://openreview.net/forum?id=FpnQMmnsE8Y)
Supplement: supplementary_material [file attachment]

## APPENDICES

## A QUANTIZE RPG

Quantization refers to techniques for performing computations and storing tensors at lower bitwidths than floating point precision. Quantization can reduce model size with tiny accuracy drop. Table 9 shows that with 8-bit quantization, regular ResNet18 has accuracy drop of 0.3 percentage point, while our ResNet18-RPG has accuracy drop of 0.1 percentage point. Therefore, RPG models can be quantized for further model size reduction

Table 9: RPG model can be quantized with very tiny accuracy drop. With 8-bit quantization on ImageNet, regular ResNet18 has accuracy drop of 0.3 percentage point, while our ResNet18-RPG has accuracy drop of 0.1 percentage point.

|           | # Params | Acc before | Acc after ↓ quantization | Acc drop |
|-----------|----------|------------|--------------------------|----------|
| Res18     | 11M      | 69.8       | 69.5                     | 0.3      |
| Res18-RPG |          | 5.6M 70.2  | 70.1                     | 0.1      |

## B PROOF TO THE ORTHOGONAL PROPOSITION

We provide proofs to the orthogonal proposition mentioned in Section 3 of the main paper. Suppose we have two vectors  $\mathbf{f}_i = \mathbf{A}_i \mathbf{f}$ ,  $\mathbf{f}_j = \mathbf{A}_j \mathbf{f}$ , where  $\mathbf{A}_i$ ,  $\mathbf{A}_j$  are sampled from the  $O(M)$  Haar distribution.

**Proposition 1.**  $E [\langle \mathbf{f}_i, \mathbf{f}_j \rangle] = 0$ .

*Proof.*

$$\begin{aligned}
 E [\langle \mathbf{f}_i, \mathbf{f}_j \rangle] &= E [\langle \mathbf{f}_i, \mathbf{f}_j \rangle] \\
 &= E [\langle \mathbf{A}_i \mathbf{f}, \mathbf{A}_j \mathbf{f} \rangle] \\
 &= E [\langle \mathbf{f}, \mathbf{A}_i^T \mathbf{A}_j \mathbf{f} \rangle] \\
 &= \mathbf{f}^T E [\mathbf{A}_i^T \mathbf{A}_j] \mathbf{f} \\
 &= 0
 \end{aligned}$$

where  $\mathbf{A}_i^T \mathbf{A}_j$  is equivalently a random sample from  $O(M)$  Haar distribution and its expectation is clearly 0.  $\square$

**Proposition 2.**  $E \left[ \left\langle \frac{\mathbf{f}_i}{\|\mathbf{f}_i\|}, \frac{\mathbf{f}_j}{\|\mathbf{f}_j\|} \right\rangle^2 \right] = \frac{1}{M}$ .

*Proof.*

$$\begin{aligned}
 E \left[ \left\langle \frac{\mathbf{f}_i}{\|\mathbf{f}_i\|}, \frac{\mathbf{f}_j}{\|\mathbf{f}_j\|} \right\rangle^2 \right] &= \frac{E [\langle \mathbf{A}_i \mathbf{f}, \mathbf{A}_j \mathbf{f} \rangle^2]}{\|\mathbf{f}\|_2^2 \|\mathbf{f}\|_2^2} \\
 &= E \left[ \left\langle \mathbf{A} \frac{\mathbf{f}}{\|\mathbf{f}\|}, \frac{\mathbf{f}}{\|\mathbf{f}\|} \right\rangle^2 \right], \text{ where } \mathbf{A} = \mathbf{A}_i^T \mathbf{A}_j \sim O(M) \text{ Haar distribution}
 \end{aligned}$$

Due to the symmetry,

$$= E \left[ \left\langle \mathbf{A} \frac{\mathbf{f}}{\|\mathbf{f}\|}, (1, 0, 0, \dots, 0)^T \right\rangle^2 \right]$$

$$\text{Let } \mathbf{g} = \mathbf{A} \frac{\mathbf{f}}{\|\mathbf{f}\|},$$

$$\begin{aligned}
 &= E [g_1^2] \\
 &= \frac{1}{M}
 \end{aligned}$$

since  $\mathbf{g}$  is a random unit vector and  $E \left[ \sum_{k=1}^M g_k^2 \right] = \sum_{k=1}^M E [g_k^2] = 1$ .  $\square$
